# Supplementary material for: CCR4a promotes metastasis and invasion of ovarian cancer by downregulating LRRC4 via PI3K/AKT Signaling Pathway Activation
Source: Research Square preprint supplement (doi:10.21203/rs.3.rs-5326843/v1), 2024-11-29
Supplement: Supplementary file 1 [file 1ea09f80a74763c1c933763c.docx]

# Table S2. The detailed information of primer sequences

| Gene | Forward | Reverse |
| --- | --- | --- |
| CCR4a | ACAGAGTGCCTATGAGAGTGGC | CAGGATGCCTAAGGTGTTCAGC |
| LRRC4 | AAGCTCTTGCTGTACCTTGTCCTT | TCATATTTGAGTTTCCTGTACCTTGTCCTT |
| β-actin | ACCAACTGGGACGATATGGAGAAGA | TACGACCAGAGGCATACAGGGACAA |
