# Supplementary material for: CCR4a promotes metastasis and invasion of ovarian cancer by downregulating LRRC4 via PI3K/AKT Signaling Pathway Activation
Source: Research Square preprint supplement (doi:10.21203/rs.3.rs-5326843/v1), 2024-11-29
Supplement: Supplementary file 2 [file 8873db28e4bfd0d25cafe224.docx]

**Table S3** **The detailed information of antibodies**

| Antibody | Producer | Application and condition | Cat number |
| --- | --- | --- | --- |
| β-actin | Cell Signaling Technology | WB (1:1000) | 4970 |
| CCR4a | Abcam | WB (1:500)  IHC (1:200) | ab221151 |
| LRRC4 | Invitrogen | WB (1:1000) | PA5-47686 |
| PIK3CA | Invitrogen | WB (1:1000) | PA5-77798 |
| PIK3R1 | Invitrogen | WB (1:1000) | 710400 |
| β-catenin | Invitrogen | WB (1:1000) | MA5-34961 |
