# Supplementary material for: CCR4a promotes metastasis and invasion of ovarian cancer by downregulating LRRC4 via PI3K/AKT Signaling Pathway Activation
Source: Research Square preprint supplement (doi:10.21203/rs.3.rs-5326843/v1), 2024-11-29
Supplement: Supplementary file 3 [file fa34d37fb67507a9b24e3627.docx]

**Table S1. Association between the CCR4a level in cancer tissues and clinicopathological characteristics**

| Clinicopathological variable | Case no. | LPCAT3 level | | χ2 value | p value |
| --- | --- | --- | --- | --- | --- |
| 51 | Low (n=19) | High (n=32) |  |  |
| Age at diagnosis, years |  |  |  | 0 | >0.05 |
| <60 | 32 | 10 (31.25%) | 22 68.75%) |  |  |
| ≥60 | 19 | 9 (47.37%) | 10 (52.63%) |  |  |
| FIGO stage |  |  |  | 6.0952 | 0.0136 |
| I/II | 16 | 13 (81.25%) | 3(18.75%) |  |  |
| III/IV | 35 | 6 (17.14%) | 29 (82.86%) |  |  |
